# Supplementary material for: Transport of trace gases via eddy shedding from the Asian summer monsoon anticyclone and associated impacts on ozone heating rates
Source: Copernicus journal article supplement (doi:10.5194/acp-18-11493-2018), 2018-08-15
Supplement: Supplementary file 1 [file acp-18-11493-2018-supplement.pdf]

Supplement of Atmos. Chem. Phys., 18, 11493–11506, 2018  
<https://doi.org/10.5194/acp-18-11493-2018-supplement>  
© Author(s) 2018. This work is distributed under  
the Creative Commons Attribution 4.0 License.

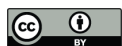

*Supplement of*

## **Transport of trace gases via eddy shedding from the Asian summer monsoon anticyclone and associated impacts on ozone heating rates**

**Suvarna Fadnavis et al.**

*Correspondence to:* Suvarna Fadnavis (suvarna@tropmet.res.in)

The copyright of individual parts of the supplement might differ from the CC BY 4.0 License.

1

2

### Supplementary Figures

3

4

5

6

7

8

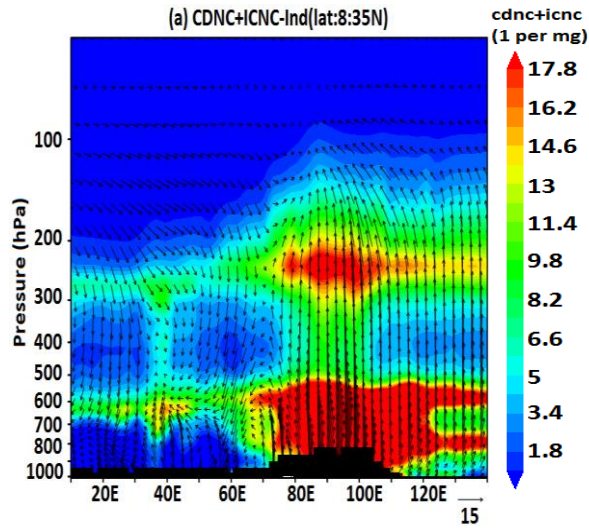

9

**Figure S1:** Distribution of combined cloud droplet (CDNC) and ice crystal (ICNC) number concentrations (in  $\text{mg}^{-1}$ ) (indicating convection) from the CTRL simulation averaged for the monsoon season (June-September) over  $8^{\circ}$ - $35^{\circ}$ N.

12

13

14

15

16

17

18

19

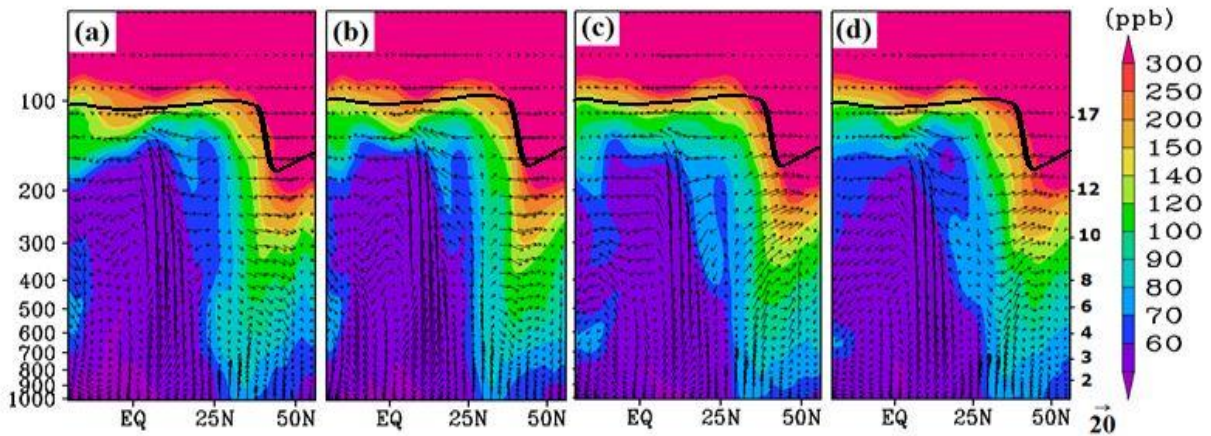

20 **Figure S2:** Latitude-pressure section at 85°E of ozone (ppb) from ECHAM5-HAMMOZ

21 CTRL simulation for (e) 02 July, (f) 04 July, (g) 06 July, (h) 08 July, 2003. Black line indicates

22 the tropopause.

23

24

25

26

27

28

29

30

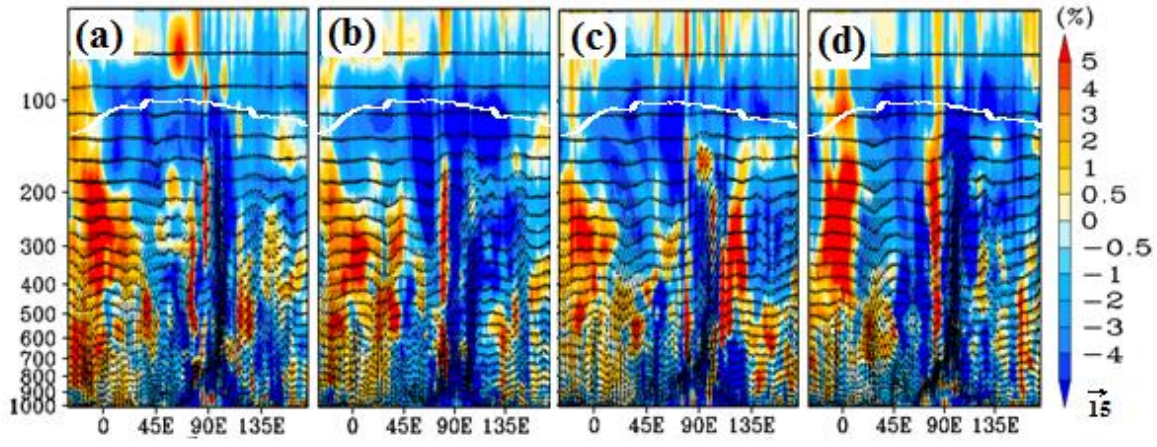

31 **Figure S3:** Longitude-pressure distribution (averaged for 20°-40° N) of anomalies of OH (%)

32 for (a) 02 July, (b) 04 July, (c) 06 July, (d) 08 July, 2003. White thick line indicates the

33 tropopause.

34

35

36

37

38

39

40

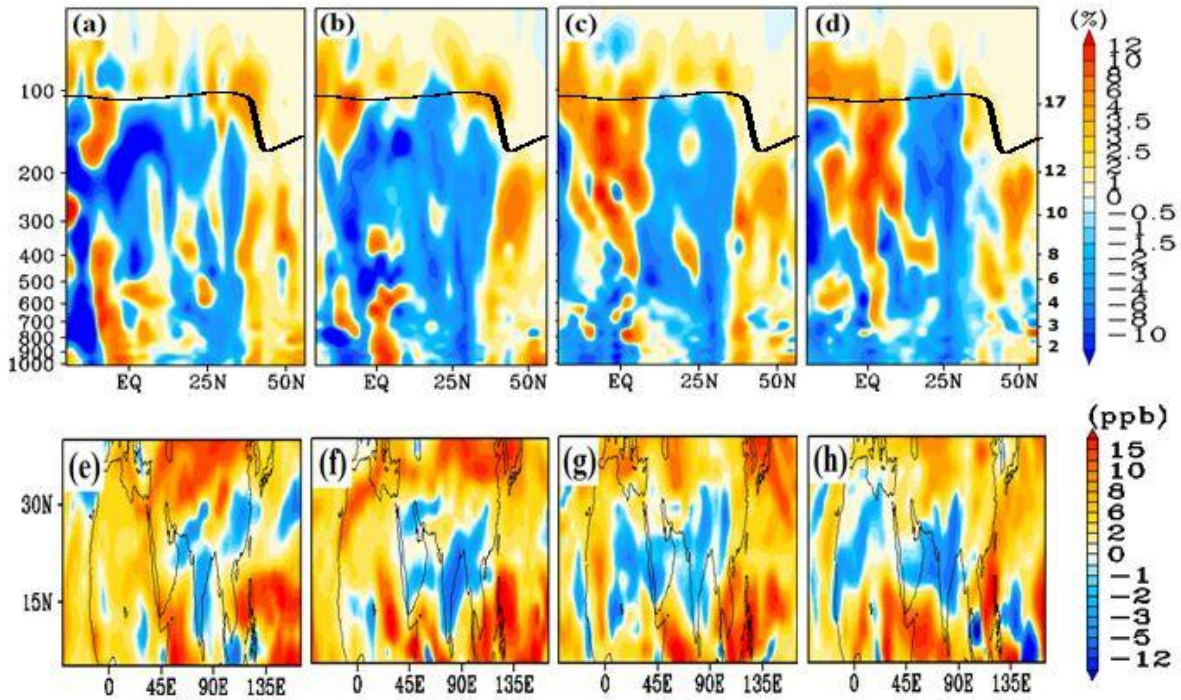

41

42

43

44 **Figure S4:** Latitude-pressure section of ozone anomalies (averaged for 18-20°N) expressed

45 as % change, (a) 02 July, (b) 04 July, (c) 06 July, (d) 08 July, 2003, black line indicates the

46 tropopause, (e)-(h) same as (a)-(d) but at 100 hPa expressed in ppb.

47

48

49

50

51

52

53

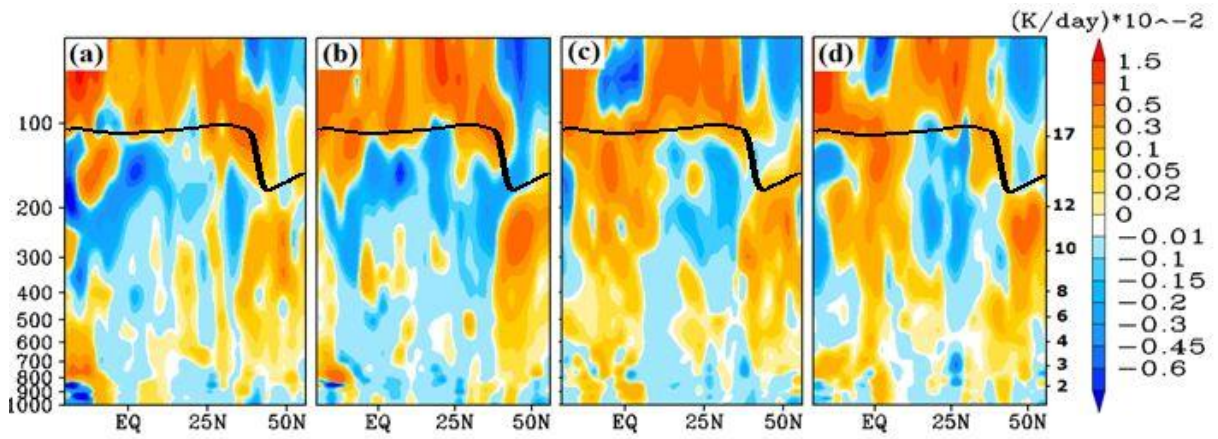

54 **Figure S5:** Latitude-pressure distribution at 85°E of anomalies of ozone heating rates ((K·day<sup>-1</sup>) × 10<sup>-2</sup>) for (a) 02 July, (b) 04 July, (c) 06 July, (d) 08 July, 2003. Pressure (hPa) is indicated  
55 on left y-axis and altitudes (km) on right y-axis. Black line indicates the tropopause.  
56

57

58

59

60
